# Supplementary material
Source: PubMed Central journal article supplement (PMC3622184)
Supplement: NIHMS449089-supplement-1.pdf [file NIHMS449089-supplement-1.pdf]

## Supplemental Data

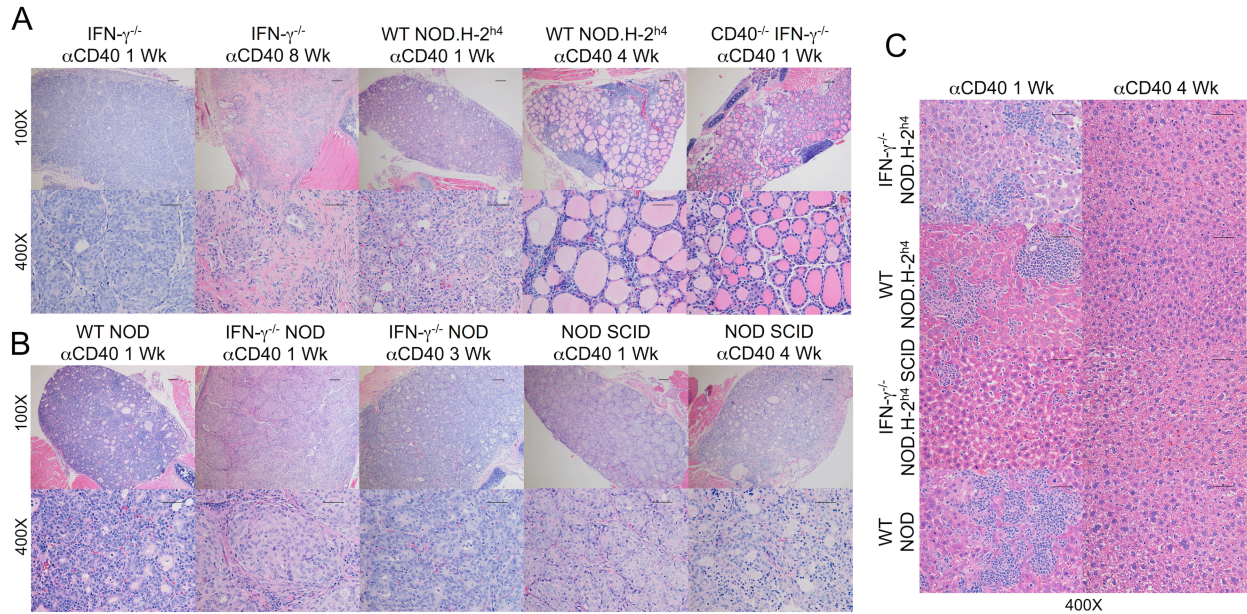

**Supplementary Figure 1.** Anti-CD40 induces thyrocyte proliferation in lymphopenic and nonlymphopenic NOD and CD40<sup>+</sup> NOD.H-2<sup>h4</sup> mice but not in CD40<sup>-/-</sup> mice. A, B. The indicated strains of mice were given 200  $\mu$ g anti-CD40, and thyroids were removed 1, 4 or 8 wk later. Some mice in each group were given isotype control and none showed any changes in their thyroids (not shown). (H&E stain 100X bar is 0.1 mm and 400X bar is 0.05 mm) Images are representative of 3-6 experiments, n = 15 and 18 for IFN- $\gamma^{-/-}$  NOD.H-2<sup>h4</sup> 1 wk and 4 wk; 10 and 11 for WT 1 wk and 4 wk; 10 for CD40<sup>-/-</sup>; 18 for WT NOD; 9 and 6 for IFN- $\gamma^{-/-}$  NOD 1 wk and 4 wk and 12 and 8 for NOD.SCID 1 wk and 4 wk. C. Livers from the indicated strains were examined for cellular infiltrate 1 or 4 wk after injection of anti-CD40. (H&E stain, 400X, bar is 0.05 mm) Images are representative of 3 experiments, n = 6-8 per group.
